# Supplementary material for: Magnon magic angles and tunable Hall conductivity in 2D twisted ferromagnetic bilayers
Source: PubMed Central journal article supplement (PMC7492363; doi:10.1038/s41598-020-72000-y), 2020-09-15
Supplement: 41598_2020_72000_MOESM1_ESM.pdf [file 41598_2020_72000_MOESM1_ESM.pdf]

## Supplementary Information

### Magnon magic angles and tunable Hall conductivity in 2D twisted ferromagnetic bilayers

D. Ghader

#### Supplementary Note 1. Landau-Lifshitz equations for honeycomb ferromagnetic monolayer.

Defining the vectors  $\vec{S}_D^{A/B} = S_y^{A/B} \hat{x} - S_x^{A/B} \hat{y}$ , we can re-write  $\mathcal{H}_{ML}$  (see expression in the main text) as

$$\begin{aligned} \mathcal{H}_{ML} = & -J \sum_{\vec{R}_A, \vec{\delta}_i^A} \vec{S}^A(\vec{R}_A, t) \cdot \vec{S}^B(\vec{R}_A + \vec{\delta}_i^A, t) \\ & + \sum_{\vec{R}_A, \vec{\gamma}_j} D_z(\vec{R}_A, \vec{R}_A + \vec{\gamma}_j) \vec{S}^A(\vec{R}_A, t) \cdot \vec{S}_D^A(\vec{R}_A + \vec{\gamma}_j, t) \\ & + \sum_{\vec{R}_B, \vec{\gamma}_j} D_z(\vec{R}_B, \vec{R}_B + \vec{\gamma}_j) \vec{S}^B(\vec{R}_B, t) \cdot \vec{S}_D^B(\vec{R}_B + \vec{\gamma}_j, t) \end{aligned}$$

The current form of  $\mathcal{H}_{ML}$  yields the effective fields  $\vec{H}^{A/B}$  on A/B sites in terms of the magnetizations  $\vec{M}^{B/A}$ , namely

$$\vec{H}^{A/B}(\vec{R}_{A/B}, t) = -J \sum_{\vec{\delta}_i^{A/B}} \vec{M}^{B/A}(\vec{R}_{A/B} + \vec{\delta}_i^{A/B}, t) + \sum_{\vec{\gamma}_j} D_z(\vec{R}_{A/B}, \vec{R}_{A/B} + \vec{\gamma}_j) \vec{M}_D^{A/B}(\vec{R}_{A/B} + \vec{\gamma}_j, t)$$

Next, substituting in the Landau-Lifshitz (LL) equation of motion for the A – sublattice,  $\partial_t \vec{M}^A = \vec{M}^A \times \vec{H}^A$ , and keeping only linear terms implies

$$\begin{aligned} \partial_t M_x^A(\vec{R}_A, t) &= -3JM_z M_y^A(\vec{R}_A, t) + JM_z \sum_{\vec{\delta}_i^A} M_y^B(\vec{R}_A + \vec{\delta}_i^A, t) \\ &\quad + M_z \sum_{\vec{\gamma}_j} D_z(\vec{R}_A, \vec{R}_A + \vec{\gamma}_j) M_x^A(\vec{R}_A + \vec{\gamma}_j, t) \end{aligned}$$

$$\begin{aligned} \partial_t M_y^A(\vec{R}_A, t) &= 3JM_z M_x^A(\vec{R}_A, t) - JM_z \sum_{\vec{\delta}_i^A} M_x^B(\vec{R}_A + \vec{\delta}_i^A, t) \\ &\quad + M_z \sum_{\vec{\gamma}_j} D_z(\vec{R}_A, \vec{R}_A + \vec{\gamma}_j) M_y^A(\vec{R}_A + \vec{\gamma}_j, t) \end{aligned}$$

$M_z$  denotes the constant z component of the magnetization. To proceed, plane wave solutions are assumed for  $\vec{M}^{B/A}(\vec{r}, t)$ ,

$$\vec{M}^{A/B}(\vec{r}, t) = \vec{M}_{\parallel}^{A/B}(\vec{r}, t) + M_z \hat{z} = [M_x^{A/B}(\vec{k}) \hat{x} + M_y^{A/B}(\vec{k}) \hat{y}] e^{i(\omega t + \vec{k} \cdot \vec{r})} + M_z \hat{z}$$

with frequency  $\omega$ . Substituting in the time dependent LL equations, we arrive at the momentum-space equations of motion

$$i\omega M_x^A(\vec{k}) = -3JM_z M_y^A(\vec{k}) + JM_z f(\vec{k}) M_y^B(\vec{k}) + DM_z f_D(\vec{k}) M_x^A(\vec{k})$$

$$i\omega M_y^A(\vec{k}) = 3JM_z M_x^A(\vec{k}) - JM_z f(\vec{k}) M_x^B(\vec{k}) + DM_z f_D(\vec{k}) M_y^A(\vec{k})$$

with

$$f(\vec{k}) = e^{ik_y \frac{a}{\sqrt{3}}} + 2e^{-i\frac{\sqrt{3}a}{6} k_y} \cos\left(\frac{a}{2} k_x\right)$$

$$f_D(\vec{k}) = 4i \sin\left(\frac{a}{2} k_x\right) \cos\left(\frac{\sqrt{3}a}{2} k_y\right) - 2i \sin(k_x a)$$

Multiply the first equation of motion by  $-i$  and summing it with the second equation implies

$$\omega M^A = [3JM_z - iDM_z f_D]M^A - JM_z f M^B$$

In a similar way, the LL equation for the B-sublattice yields

$$\omega M^B = -JM_z f^* M^A + [3JM_z + iDM_z f_D]M^B$$

We hence arrive at the momentum-space Hamiltonian for the ferromagnetic monolayer as

$$\mathcal{H}_{ML}(\vec{k}) = JM_z \begin{pmatrix} 3 - \frac{iD}{J}f_D(\vec{k}) & -f(\vec{k}) \\ -f^*(\vec{k}) & 3 + \frac{iD}{J}f_D(\vec{k}) \end{pmatrix}.$$

$\mathcal{H}_{ML}(\vec{k})$  admits 2 eigenvalues, namely

$$\Omega_{\pm}(\vec{k}) = \frac{\omega_{\pm}(\vec{k})}{JM_z} = 3 \pm \sqrt{|f(\vec{k})|^2 - \left(\frac{D}{J}f_D(\vec{k})\right)^2}$$

$\Omega_{\pm}(\vec{k})$  correspond to the conduction-like and valence-like bands for magnons in the 2D honeycomb ferromagnetic monolayer.

**Supplementary Note 2. The Heisenberg Hamiltonian for tFBL in a less compact form.**

$$\begin{aligned}
\mathcal{H}_T = & -J \sum_{\vec{R}_{A_1}, \vec{\delta}_i^A} \vec{S}^{A_1}(\vec{R}_{A_1}, t) \cdot \vec{S}^{B_1}(\vec{R}_{A_1} + \vec{\delta}_i^A, t) - J \sum_{\vec{R}_{A_2}, \vec{\delta}_i^A} \vec{S}^{A_2}(\vec{R}_{A_2}, t) \cdot \vec{S}^{B_2}(\vec{R}_{A_2} + \vec{\delta}_i^A, t) \\
& + \sum_{\vec{R}_{A_1}, \vec{\gamma}_j} \vec{D}(\vec{R}_{A_1}, \vec{R}_{A_1} + \vec{\gamma}_j) \cdot [\vec{S}^{A_1}(\vec{R}_{A_1}, t) \times \vec{S}^{A_1}(\vec{R}_{A_1} + \vec{\gamma}_j, t)] \\
& + \sum_{\vec{R}_{B_1}, \vec{\gamma}_j} \vec{D}(\vec{R}_{B_1}, \vec{R}_{B_1} + \vec{\gamma}_j) \cdot [\vec{S}^{B_1}(\vec{R}_{B_1}, t) \times \vec{S}^{B_1}(\vec{R}_{B_1} + \vec{\gamma}_j, t)] \\
& + \sum_{\vec{R}_{A_2}, \vec{\gamma}_j} \vec{D}(\vec{R}_{A_2}, \vec{R}_{A_2} + \vec{\gamma}_j) \cdot [\vec{S}^{A_2}(\vec{R}_{A_2}, t) \times \vec{S}^{A_2}(\vec{R}_{A_2} + \vec{\gamma}_j, t)] \\
& + \sum_{\vec{R}_{B_2}, \vec{\gamma}_j} \vec{D}(\vec{R}_{B_2}, \vec{R}_{B_2} + \vec{\gamma}_j) \cdot [\vec{S}^{B_2}(\vec{R}_{B_2}, t) \times \vec{S}^{B_2}(\vec{R}_{B_2} + \vec{\gamma}_j, t)] \\
& - \sum_{\vec{R}_{A_1}, \vec{R}_{A_2}} J_{\perp}(\vec{R}_{A_1}, \vec{R}_{A_2}) \vec{S}^{A_1}(\vec{R}_{A_1}, t) \cdot \vec{S}^{A_2}(\vec{R}_{A_2}, t) - \sum_{\vec{R}_{A_1}, \vec{R}_{B_2}} J_{\perp}(\vec{R}_{A_1}, \vec{R}_{B_2}) \vec{S}^{A_1}(\vec{R}_{A_1}, t) \cdot \vec{S}^{B_2}(\vec{R}_{B_2}, t) \\
& - \sum_{\vec{R}_{B_1}, \vec{R}_{A_2}} J_{\perp}(\vec{R}_{B_1}, \vec{R}_{A_2}) \vec{S}^{B_1}(\vec{R}_{B_1}, t) \cdot \vec{S}^{A_2}(\vec{R}_{A_2}, t) - \sum_{\vec{R}_{B_1}, \vec{R}_{B_2}} J_{\perp}(\vec{R}_{B_1}, \vec{R}_{B_2}) \vec{S}^{B_1}(\vec{R}_{B_1}, t) \cdot \vec{S}^{B_2}(\vec{R}_{B_2}, t)
\end{aligned}$$

**Supplementary Note 3. Landau-Lifshitz equations in tFBL.**

In the monolayer, the lattice basis vectors are  $\vec{a}_1 = a\left(\frac{1}{2}, \frac{\sqrt{3}}{2}\right)$  and  $\vec{a}_2 = a\left(-1/2, \sqrt{3}/2\right)$  whereas the basis vectors in momentum-space are  $\vec{b}_1 = \frac{2\pi}{3a}(\sqrt{3}, 1)$  and  $\vec{b}_2 = \frac{2\pi}{3a}(-\sqrt{3}, 1)$ . These can be generalized to the tFBL as  $\vec{a}_{l,\alpha}$  and  $\vec{b}_{l,\alpha}$  respectively ( $\alpha = A$  or  $B$  and  $l = 1$  or  $2$ ). They can be expressed as

$$\vec{a}_{2,\alpha} = R_{\theta/2}(\vec{a}_{\alpha} + \vec{\tau}_0)$$

$$\vec{a}_{1,\alpha} = R_{-\theta/2} \vec{a}_{\alpha}$$

$$\vec{b}_{2,\alpha} = R_{\theta/2} \vec{b}_{\alpha}$$

$$\vec{b}_{1,\alpha} = R_{-\theta/2} \vec{b}_{\alpha}$$

$R_\theta$  is a 2D anticlockwise rotation by  $\theta$ . Next, the positions of the atoms on the four sublattices can be generated by the vectors

$$\vec{R}_{A_1} = \vec{R}_1 + \vec{\tau}_{1,A}$$

$$\vec{R}_{B_1} = \vec{R}_1 + \vec{\tau}_{1,B}$$

$$\vec{R}_{A_2} = \vec{R}_2 + \vec{\tau}_{2,A}$$

$$\vec{R}_{B_2} = \vec{R}_2 + \vec{\tau}_{2,B}$$

with  $\vec{R}_l = n_1 \vec{a}_{l,1} + n_2 \vec{a}_{l,2}$  ( $n_1, n_2 \in \mathbb{Z}$ ),  $\vec{\tau}_{1,A} = (0,0)$ ,  $\vec{\tau}_{1,B} = R_{-\theta/2}(0, d)$ ,  $\vec{\tau}_{2,A} = R_{\theta/2}[(0, -d) + \vec{\tau}_0]$ , and  $\vec{\tau}_{2,B} = R_{\theta/2} \vec{\tau}_0$ .

The twist generates a moiré superlattice, with reciprocal basis vectors

$$\vec{b}_1^m = \vec{b}_{1,1} - \vec{b}_{2,1} = \frac{8\pi \sin(\theta/2)}{3d} (1, -\sqrt{3})$$

$$\vec{b}_2^m = \vec{b}_{1,2} - \vec{b}_{2,2} = \frac{8\pi \sin(\theta/2)}{3d} (1, \sqrt{3})$$

We recall the expression of the Heisenberg Hamiltonian  $\mathcal{H}_T$  for the tFBL,

$$\begin{aligned} \mathcal{H}_T = & -J \sum_{l, \vec{\delta}_l^A} \vec{S}^{A_l}(\vec{R}_{A_l}, t) \cdot \vec{S}^{B_l}(\vec{R}_{A_l} + \vec{\delta}_l^A, t) - \sum_{\alpha, \beta} J_\perp(\vec{R}_{\alpha_1}, \vec{R}_{\beta_2}) \vec{S}^{\alpha_1}(\vec{R}_{\alpha_1}, t) \cdot \vec{S}^{\beta_2}(\vec{R}_{\beta_2}, t) \\ & + \sum_{\alpha, l, \vec{\gamma}_j} \vec{D}(\vec{R}_{\alpha_l}, \vec{R}_{\alpha_l} + \vec{\gamma}_j) \cdot [\vec{S}^{\alpha_l}(\vec{R}_{\alpha_l}, t) \times \vec{S}^{\alpha_l}(\vec{R}_{\alpha_l} + \vec{\gamma}_j, t)] \end{aligned} \quad (\text{S1})$$

Similar to the monolayer case, we can write the DMI term in  $\mathcal{H}_T$  as a scalar product,

$$\begin{aligned} \sum_{\alpha, l, \vec{\gamma}_j} \vec{D}(\vec{R}_{\alpha_l}, \vec{R}_{\alpha_l} + \vec{\gamma}_j) \cdot [\vec{S}^{\alpha_l}(\vec{R}_{\alpha_l}, t) \times \vec{S}^{\alpha_l}(\vec{R}_{\alpha_l} + \vec{\gamma}_j, t)] = \\ \sum_{\alpha, l, \vec{\gamma}_j} D_z(\vec{R}_{\alpha_l}, \vec{R}_{\alpha_l} + \vec{\gamma}_j) \vec{S}^{\alpha_l}(\vec{R}_{\alpha_l}, t) \cdot \vec{S}_D^{\alpha_l}(\vec{R}_{\alpha_l} + \vec{\gamma}_j, t) \end{aligned}$$

with  $\vec{S}_D^{\alpha_l} = S_y^{\alpha_l} \hat{x} - S_x^{\alpha_l} \hat{y}$ .

We can now deduce the effective exchange fields  $\vec{H}^{\alpha_l}$  acting on the magnetization  $\vec{M}^{\alpha_l}$

$$\begin{aligned} \vec{H}^{\alpha_l}(\vec{R}_{\alpha_l}, t) = & -J \sum_{\vec{\delta}_i^\alpha} \vec{M}^{\bar{\alpha}_l}(\vec{R}_{\alpha_l} + \vec{\delta}_i^\alpha, t) + \sum_{\vec{\gamma}_j} D_z(\vec{R}_{\alpha_l}, \vec{R}_{\alpha_l} + \vec{\gamma}_j) \vec{M}_D^{\alpha_l}(\vec{R}_{\alpha_l} + \vec{\gamma}_j, t) \\ & - \sum_{\vec{R}_{\alpha_{\bar{l}}}} J_\perp(\vec{R}_{\alpha_l}, \vec{R}_{\alpha_{\bar{l}}}) \vec{M}^{\alpha_{\bar{l}}}(\vec{R}_{\alpha_{\bar{l}}}, t) - \sum_{\vec{R}_{\bar{\alpha}_l}} J_\perp(\vec{R}_{\alpha_l}, \vec{R}_{\bar{\alpha}_l}) \vec{M}^{\bar{\alpha}_l}(\vec{R}_{\bar{\alpha}_l}, t) \end{aligned} \quad (\text{S2})$$

where we have used the convention that if  $\alpha = A$  then  $\bar{\alpha} = B$  and vice versa. Same convention assumed for  $l$  and  $\bar{l}$ .

We assume harmonic time dependence (with frequency  $\omega$ ) for the magnetizations. The  $x$  and  $y$  components of the LL equations of motion,  $\partial_t \vec{M}^{\alpha_l} = \vec{M}^{\alpha_l} \times \vec{H}^{\alpha_l}$ , yield 2 equations of motion for each sublattice  $\alpha_l$ . Combining the  $x$  and  $y$  equations yield

$$\begin{aligned} \omega M^{\alpha_l}(\vec{R}_{\alpha_l}) = & \left[ 3JM_z + M_z \sum_{\vec{R}_{\alpha_{\bar{l}}}} J_\perp(\vec{R}_{\alpha_l}, \vec{R}_{\alpha_{\bar{l}}}) + M_z \sum_{\vec{R}_{\bar{\alpha}_l}} J_\perp(\vec{R}_{\alpha_l}, \vec{R}_{\bar{\alpha}_l}) \right] M^{\alpha_l}(\vec{R}_{\alpha_l}) \\ & - JM_z \sum_{\vec{\delta}_i^\alpha} M^{\bar{\alpha}_l}(\vec{R}_{\alpha_l} + \vec{\delta}_i^\alpha) - iM_z \sum_{\vec{\gamma}_j} D_z(\vec{R}_{\alpha_l}, \vec{R}_{\alpha_l} + \vec{\gamma}_j) M^{\alpha_l}(\vec{R}_{\alpha_l} + \vec{\gamma}_j, t) \\ & - M_z \sum_{\vec{R}_{\alpha_{\bar{l}}}} J_\perp(\vec{R}_{\alpha_l}, \vec{R}_{\alpha_{\bar{l}}}) M^{\alpha_{\bar{l}}}(\vec{R}_{\alpha_{\bar{l}}}) - M_z \sum_{\vec{R}_{\bar{\alpha}_l}} J_\perp(\vec{R}_{\alpha_l}, \vec{R}_{\bar{\alpha}_l}) M^{\bar{\alpha}_l}(\vec{R}_{\bar{\alpha}_l}) \end{aligned} \quad (\text{S3})$$

with  $M^{\alpha_l} = M_x^{\alpha_l} + iM_y^{\alpha_l}$ .

We next expand the magnetization amplitudes in terms of Bloch waves

$$\begin{aligned}
\frac{\omega}{\sqrt{N_l}} \sum_{\vec{k}'_l} e^{i\vec{k}'_l \cdot \vec{R}_{\alpha_l}} u_{\alpha_l}(\vec{k}'_l) &= -\frac{JM_z}{\sqrt{N_l}} \sum_{\vec{k}'_l} f_{ex}^\alpha(\vec{k}'_l) e^{i\vec{k}'_l \cdot \vec{R}_{\alpha_l}} u_{\bar{\alpha}_l}(\vec{k}'_l) + \\
\frac{1}{\sqrt{N_l}} \left[ 3M_z J + M_z D f_D^\alpha(\vec{k}'_l) + M_z \sum_{\vec{R}_{\alpha_l}} J_\perp(\vec{R}_{\alpha_l}, \vec{R}_{\alpha_l}) + M_z \sum_{\vec{R}_{\bar{\alpha}_l}} J_\perp(\vec{R}_{\alpha_l}, \vec{R}_{\bar{\alpha}_l}) \right] &\sum_{\vec{k}'_l} e^{i\vec{k}'_l \cdot \vec{R}_{\alpha_l}} u_{\alpha_l}(\vec{k}'_l) \\
-\frac{M_z}{\sqrt{N_l}} \sum_{\vec{R}_{\alpha_l}, \vec{k}'_l} J_\perp(\vec{R}_{\alpha_l}, \vec{R}_{\alpha_l}) e^{i\vec{k}'_l \cdot \vec{R}_{\alpha_l}} u_{\alpha_l}(\vec{k}'_l) - \frac{M_z}{\sqrt{N_l}} \sum_{\vec{R}_{\bar{\alpha}_l}, \vec{k}'_l} J_\perp(\vec{R}_{\alpha_l}, \vec{R}_{\bar{\alpha}_l}) e^{i\vec{k}'_l \cdot \vec{R}_{\bar{\alpha}_l}} u_{\bar{\alpha}_l}(\vec{k}'_l) &
\end{aligned} \tag{S4}$$

$N_l$  and  $N_{\bar{l}}$  are the number of unit cells while  $\vec{k}'_l$  and  $\vec{k}'_{\bar{l}}$  are wave vectors in layers  $l$  and  $\bar{l}$ . We have also defined

$$\begin{aligned}
f_{ex}^A(\vec{k}'_l) &= \sum_{\vec{\delta}_i^A} e^{i\vec{k}'_l \cdot \vec{\delta}_i^A} = e^{ik'_{l,y} \frac{a}{\sqrt{3}}} + 2e^{-i\frac{\sqrt{3}a}{6} k'_{l,y}} \cos\left(\frac{a}{2} k'_{l,x}\right) = (f_{ex}^B(\vec{k}'_l))^* \\
f_D^A(\vec{k}'_l) &= \sum_{\vec{\gamma}_j} e^{i\vec{k}'_l \cdot \vec{\gamma}_j} = 4\sin\left(\frac{a}{2} k_x\right) \cos\left(\frac{\sqrt{3}a}{2} k_y\right) - 2\sin(k_x a) = -f_D^B(\vec{k}'_l)
\end{aligned} \tag{S5}$$

Finally, we multiply equation S4 by  $e^{-i\vec{k}'_l \cdot \vec{R}_{\alpha_l}}$  and sum the whole equation over  $\vec{R}_{\alpha_l}$  to get

$$\begin{aligned}
\omega u_{\alpha_l}(\vec{k}_l) &= [3M_z J + M_z D f_D^\alpha(\vec{k}'_l)] u_{\alpha_l}(\vec{k}_l) - JM_z f_{ex}^\alpha(\vec{k}'_l) u_{\bar{\alpha}_l}(\vec{k}_l) \\
&+ M_z \sum_{\vec{k}'_l} [J^{\alpha_l, \alpha_{\bar{l}}}(\vec{k}_l, \vec{k}'_l) + J^{\alpha_l, \bar{\alpha}_{\bar{l}}}(\vec{k}_l, \vec{k}'_l)] u_{\alpha_l}(\vec{k}'_l) \\
&- M_z \sum_{\vec{k}'_{\bar{l}}} J_\perp^{\alpha_l, \alpha_{\bar{l}}}(\vec{k}_l, \vec{k}'_{\bar{l}}) u_{\alpha_{\bar{l}}}(\vec{k}'_{\bar{l}}) - M_z \sum_{\vec{k}'_{\bar{l}}} J_\perp^{\alpha_l, \bar{\alpha}_{\bar{l}}}(\vec{k}_l, \vec{k}'_{\bar{l}}) u_{\bar{\alpha}_{\bar{l}}}(\vec{k}'_{\bar{l}})
\end{aligned} \tag{S6}$$

with the interlayer coefficients defined as

$$J_\perp^{\alpha_l, \alpha_{\bar{l}}}(\vec{k}_l, \vec{k}_{\bar{l}}) = \frac{1}{\sqrt{N_l N_{\bar{l}}}} \sum_{\vec{R}_{\alpha_l}, \vec{R}_{\bar{\alpha}_l}} e^{-i\vec{k}_{\bar{l}} \cdot \vec{R}_{\alpha_l}} J_\perp(\vec{R}_{\alpha_l}, \vec{R}_{\bar{\alpha}_l}) e^{i\vec{k}_{\bar{l}} \cdot \vec{R}_{\bar{\alpha}_l}} \tag{S7a}$$

$$J_{\perp}^{\alpha_l, \bar{\alpha}_l}(\vec{k}_l, \vec{k}_l) = \frac{1}{\sqrt{N_l N_{\bar{l}}}} \sum_{\vec{R}_{\alpha_l}, \vec{R}_{\bar{\alpha}_l}} e^{-i\vec{k}_l \cdot \vec{R}_{\alpha_l}} J_{\perp}(\vec{R}_{\alpha_l}, \vec{R}_{\bar{\alpha}_l}) e^{i\vec{k}_l \cdot \vec{R}_{\bar{\alpha}_l}} \quad (\text{S7b})$$

while the intralayer coefficients read

$$J^{\alpha_l, \alpha_l}(\vec{k}_l, \vec{k}_l') = \frac{1}{N_l} \sum_{\vec{R}_{\alpha_l}, \vec{R}_{\alpha_l'}} e^{-i(\vec{k}_l - \vec{k}_l') \cdot \vec{R}_{\alpha_l}} J_{\perp}(\vec{R}_{\alpha_l}, \vec{R}_{\alpha_l'}) \quad (\text{S8a})$$

$$J^{\alpha_l, \bar{\alpha}_l}(\vec{k}_l, \vec{k}_l') = \frac{1}{N_l} \sum_{\vec{R}_{\alpha_l}, \vec{R}_{\bar{\alpha}_l}} e^{-i(\vec{k}_l - \vec{k}_l') \cdot \vec{R}_{\alpha_l}} J_{\perp}(\vec{R}_{\alpha_l}, \vec{R}_{\bar{\alpha}_l}) \quad (\text{S8b})$$

The interlayer terms in the LL equations are qualitatively identical to those encountered in the electronic theory of tBLG. The Bistritzer - MacDonald continuum approach yields the identities

$$J_{\perp}^{\alpha_l, \alpha_l}(\vec{K}_l + \vec{q}_l, \vec{K}_{\bar{l}} + \vec{q}_{\bar{l}}) = \frac{J_{\perp}}{3} \left[ \delta_{\vec{q}_l - \vec{q}_{\bar{l}}, -(\vec{K}_l - \vec{K}_{\bar{l}})} + e^{i\vec{b}_{l,2} \cdot \vec{\tau}_{l,\alpha}} e^{-i\vec{b}_{\bar{l},2} \cdot \vec{\tau}_{\bar{l},\alpha}} \delta_{\vec{q}_l - \vec{q}_{\bar{l}}, -(\vec{K}_l - \vec{K}_{\bar{l}} + \vec{b}_{l,2} - \vec{b}_{\bar{l},2})} \right. \\ \left. + e^{-i\vec{b}_{l,1} \cdot \vec{\tau}_{l,\alpha}} e^{i\vec{b}_{\bar{l},1} \cdot \vec{\tau}_{\bar{l},\alpha}} \delta_{\vec{q}_l - \vec{q}_{\bar{l}}, -(\vec{K}_l - \vec{K}_{\bar{l}} - \vec{b}_{l,1} + \vec{b}_{\bar{l},1})} \right] \quad (\text{S9a})$$

$$J_{\perp}^{\alpha_l, \bar{\alpha}_l}(\vec{K}_l + \vec{q}_l, \vec{K}_{\bar{l}} + \vec{q}_{\bar{l}}) = \frac{J_{\perp}}{3} \left[ \delta_{\vec{q}_l - \vec{q}_{\bar{l}}, -(\vec{K}_l - \vec{K}_{\bar{l}})} + e^{i\vec{b}_{l,2} \cdot \vec{\tau}_{l,\alpha}} e^{-i\vec{b}_{\bar{l},2} \cdot \vec{\tau}_{\bar{l},\bar{\alpha}}} \delta_{\vec{q}_l - \vec{q}_{\bar{l}}, -(\vec{K}_l - \vec{K}_{\bar{l}} + \vec{b}_{l,2} - \vec{b}_{\bar{l},2})} \right. \\ \left. + e^{-i\vec{b}_{l,1} \cdot \vec{\tau}_{l,\alpha}} e^{i\vec{b}_{\bar{l},1} \cdot \vec{\tau}_{\bar{l},\bar{\alpha}}} \delta_{\vec{q}_l - \vec{q}_{\bar{l}}, -(\vec{K}_l - \vec{K}_{\bar{l}} - \vec{b}_{l,1} + \vec{b}_{\bar{l},1})} \right] \quad (\text{S9b})$$

We now consider the intralayer coefficients presented in equations S8a and S8b, absent in the electronic theory of graphene. The starting point is the Fourier transform of  $J_{\perp}(\vec{R}_{\alpha_l}, \vec{R}_{\alpha_l'})$ ,



$$\begin{aligned}
J^{\alpha_l, \alpha_{\bar{l}}}(\vec{k}_l, \vec{k}'_l) &= \frac{1}{N_l} \sum_{\vec{R}_{\alpha_l}, \vec{R}_{\alpha_{\bar{l}}}} e^{-i(\vec{k}_l - \vec{k}'_l) \cdot \vec{R}_{\alpha_l}} J_{\perp}(\vec{R}_{\alpha_l}, \vec{R}_{\alpha_{\bar{l}}}) \\
&= \frac{1}{N_l} \int_{\mathbb{R}^2} \frac{d^2 \vec{p}}{(2\pi)^2} \tilde{J}_{\perp}(\vec{p}) \sum_{\vec{R}_l} e^{-i(\vec{k}_l - \vec{k}'_l - \vec{p}) \cdot (\vec{R}_l + \vec{\tau}_{l,\alpha})} \sum_{\vec{R}_{\bar{l}}} e^{-i\vec{p} \cdot (\vec{R}_{\bar{l}} + \vec{\tau}_{\bar{l},\alpha})} \\
&= N_{\bar{l}} \int_{\mathbb{R}^2} \frac{d^2 \vec{p}}{(2\pi)^2} \tilde{J}_{\perp}(\vec{p}) \sum_{\vec{G}_l, \vec{G}_{\bar{l}}} e^{-i\vec{G}_l \cdot \vec{\tau}_{l,\alpha}} e^{-i\vec{G}_{\bar{l}} \cdot \vec{\tau}_{\bar{l},\alpha}} \delta_{\vec{k}_l - \vec{k}'_l - \vec{p}, \vec{G}_l} \delta_{\vec{p}, \vec{G}_{\bar{l}}} \\
&= \frac{1}{A} \sum_{\vec{G}_l, \vec{G}_{\bar{l}}} \tilde{J}_{\perp}(\vec{G}_{\bar{l}}) e^{-i\vec{G}_l \cdot \vec{\tau}_{l,\alpha}} e^{i\vec{G}_{\bar{l}} \cdot \vec{\tau}_{\bar{l},\alpha}} \delta_{\vec{k}_l - \vec{k}'_l, \vec{G}_l - \vec{G}_{\bar{l}}}
\end{aligned}$$

In the present case, both  $\vec{k}_l$  and  $\vec{k}'_l$  are expanded near  $K_l$ ,

$$J^{\alpha_l, \alpha_{\bar{l}}}(\vec{K}_l + \vec{q}_l, \vec{K}_l + \vec{q}'_l) = \frac{1}{A} \sum_{\vec{G}_l, \vec{G}_{\bar{l}}} \tilde{J}_{\perp}(\vec{G}_{\bar{l}}) e^{-i\vec{G}_l \cdot \vec{\tau}_{l,\alpha}} e^{i\vec{G}_{\bar{l}} \cdot \vec{\tau}_{\bar{l},\alpha}} \delta_{\vec{q}_l - \vec{q}'_l, \vec{G}_l - \vec{G}_{\bar{l}}} \quad (\text{S10a})$$

Similarly

$$J^{\alpha_l, \bar{\alpha}_{\bar{l}}}(\vec{K}_l + \vec{q}_l, \vec{K}_l + \vec{q}'_l) = \frac{1}{A} \sum_{\vec{G}_l, \vec{G}_{\bar{l}}} \tilde{J}_{\perp}(\vec{G}_{\bar{l}}) e^{-i\vec{G}_l \cdot \vec{\tau}_{l,\alpha}} e^{i\vec{G}_{\bar{l}} \cdot \vec{\tau}_{\bar{l},\bar{\alpha}}} \delta_{\vec{q}_l - \vec{q}'_l, \vec{G}_l - \vec{G}_{\bar{l}}} \quad (\text{S10b})$$

Near  $K_l$ , the vectors  $\vec{q}_l - \vec{q}'_l$  in equations S10 are very small and match only moiré reciprocal lattice vectors  $\vec{G}^m = \vec{G}_l - \vec{G}_{\bar{l}} = \pm(R_{-\theta/2} \vec{G} - R_{\theta/2} \vec{G})$ . Here  $\vec{G} = n_1 \vec{b}_1 + n_2 \vec{b}_2$  is a reciprocal lattice vector of the unrotated honeycomb monolayer. The summation in S10 hence reduces to a summation over  $\vec{G}$  of the unrotated lattice. For example,

$$J^{A_1, A_2}(\vec{K}_1 + \vec{q}_1, \vec{K}_1 + \vec{q}'_1) = \frac{1}{A} \sum_{\vec{G}} \tilde{J}_{\perp}(|\vec{G}|) e^{-i\vec{G} \cdot (0,0)} e^{i\vec{G} \cdot [(0,-d) + \vec{\tau}_0]} \delta_{\vec{q}_1 - \vec{q}'_1, R_{-\theta/2} \vec{G} - R_{\theta/2} \vec{G}} \quad (\text{S11})$$

In the summation present in equation 11, we only need to consider the most relevant contributions, namely  $\vec{G} = \vec{0}, \pm\vec{b}_1$ , and  $\pm\vec{b}_2$ . Consequently,

$$\begin{aligned} \mathcal{J}^{A_1, A_2}(\vec{K}_1 + \vec{q}_1, \vec{K}_1 + \vec{q}'_1) = & \\ & \frac{J_{\perp}(0)}{A} \delta_{\vec{q}_1 - \vec{q}'_1, \vec{0}} + \frac{J_{\perp}(\sqrt{3} \times |\vec{K}|)}{A} \left[ e^{i(\vec{b}_1 \cdot \vec{\tau}_0 - \varphi)} \delta_{\vec{q}_1 - \vec{q}'_1, \vec{G}_1^m} + e^{-i(\vec{b}_1 \cdot \vec{\tau}_0 - \varphi)} \delta_{\vec{q}_1 - \vec{q}'_1, -\vec{G}_1^m} \right] \\ & + \frac{J_{\perp}(\sqrt{3} \times |\vec{K}|)}{A} \left[ e^{i(\vec{b}_2 \cdot \vec{\tau}_0 - \varphi)} \delta_{\vec{q}_1 - \vec{q}'_1, \vec{G}_2^m} + e^{-i(\vec{b}_2 \cdot \vec{\tau}_0 - \varphi)} \delta_{\vec{q}_1 - \vec{q}'_1, -\vec{G}_2^m} \right] \end{aligned}$$

with  $\varphi = 2\pi/3$ ,  $\vec{G}_1^m = R_{-\theta/2} \vec{b}_1 - R_{\theta/2} \vec{b}_1$  and  $\vec{G}_2^m = R_{-\theta/2} \vec{b}_2 - R_{\theta/2} \vec{b}_2$ . We have also used the fact  $\tilde{J}_{\perp}(|\vec{b}_1|) = \tilde{J}_{\perp}(|\vec{b}_2|) = \tilde{J}_{\perp}(\sqrt{3} \times |\vec{K}_1|) = \tilde{J}_{\perp}(\sqrt{3} \times |\vec{K}|)$ .

Before proceeding, we note that for the case  $\theta = 0$ , the summation in S11 becomes infinite and  $J^{\alpha_l, \alpha_{\bar{l}}}$  converges to  $J_{\perp}(d_{\alpha_l, \alpha_{\bar{l}}})$ , where  $d_{\alpha_l, \alpha_{\bar{l}}}$  denotes the distance between sites  $\alpha_l$  and  $\alpha_{\bar{l}}$ . This perfectly reproduces the AA/AB stacking cases.

In van der Waals magnetic materials, the interlayer Fourier transform  $\tilde{J}_{\perp}(k)$  is extremely sharp and  $\tilde{J}_{\perp}(\sqrt{3} \times |\vec{K}|)$  is negligible compared to  $\tilde{J}_{\perp}(0)$ . We hence arrive at the simple expressions

$$J^{\alpha_l, \alpha_{\bar{l}}}(\vec{K}_l + \vec{q}_l, \vec{K}_l + \vec{q}'_l) \approx J^{\alpha_l, \alpha_{\bar{l}}}(\vec{K}_l + \vec{q}_l, \vec{K}_l + \vec{q}'_l) \approx \frac{J_{\perp}(0)}{A} \delta_{\vec{q}_l, \vec{q}'_l} \quad (\text{S12})$$

With this faithful approximation, the magnon theory is independent of  $\vec{\tau}_0$  as in tBLG (we set  $\vec{\tau}_0 = \vec{0}$ ). Substituting equations S9 and S12 in S6 then expanding  $f_{ex}^{\alpha}(\vec{k}'_l)$  and  $f_D^{\alpha}$  near  $K_l$  and  $K_{\bar{l}}$  yields the final expressions of the LL equations (equations 3 in the main text).

**Supplementary Note 4. Numerical results for magnon band reconstruction.**

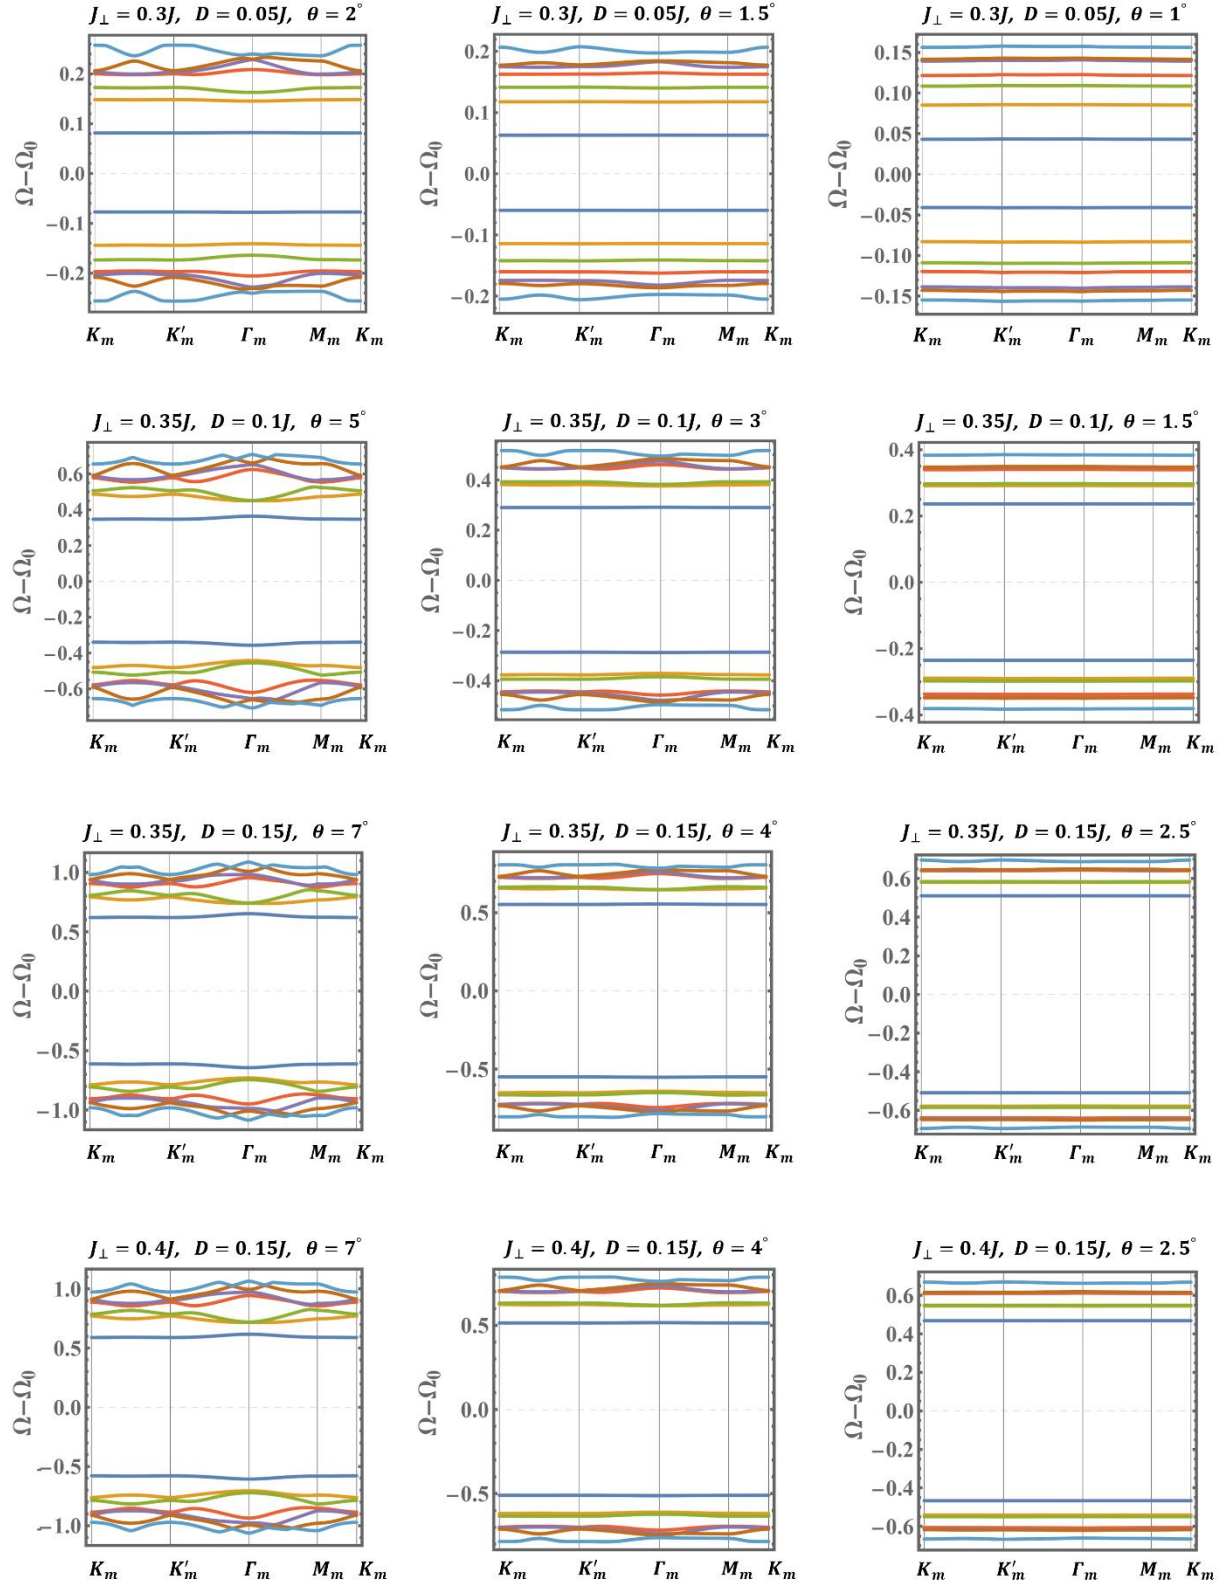

**Figure S1:** Reconstruction of the  $K$  – valley magnon spectrum for selected values of  $J_{\perp}$  and  $D$ .
